# Supplementary material for: Handling by avian frugivores affects diaspore secondary removal
Source: PubMed Central journal article supplement (PMC6114891; doi:10.1371/journal.pone.0202435), 2018-08-29
Supplement: pone.0202435.s001.pdf [file pone.0202435.s001.pdf]

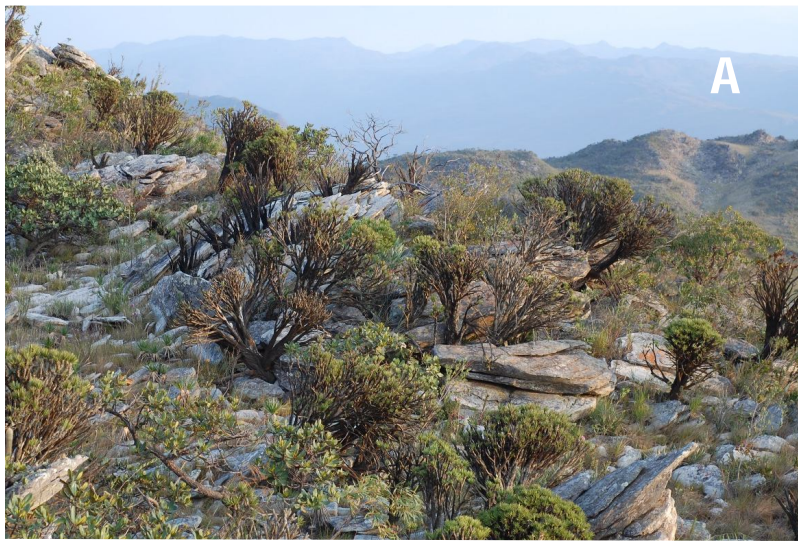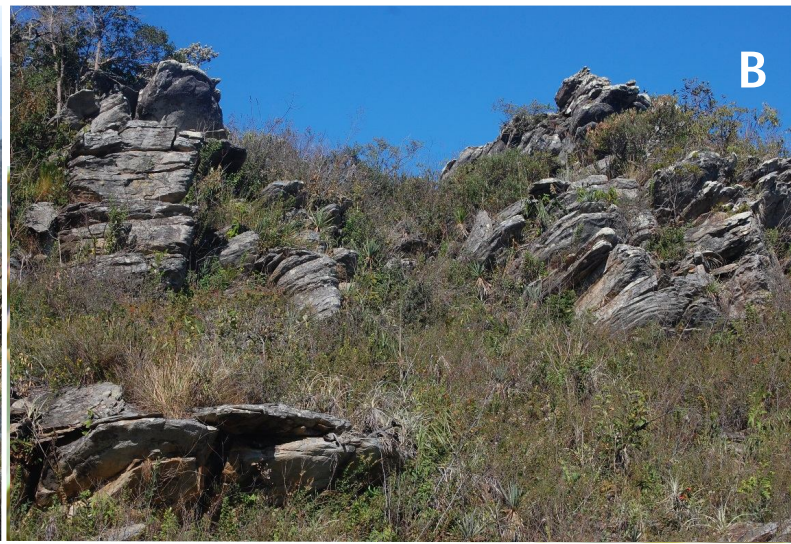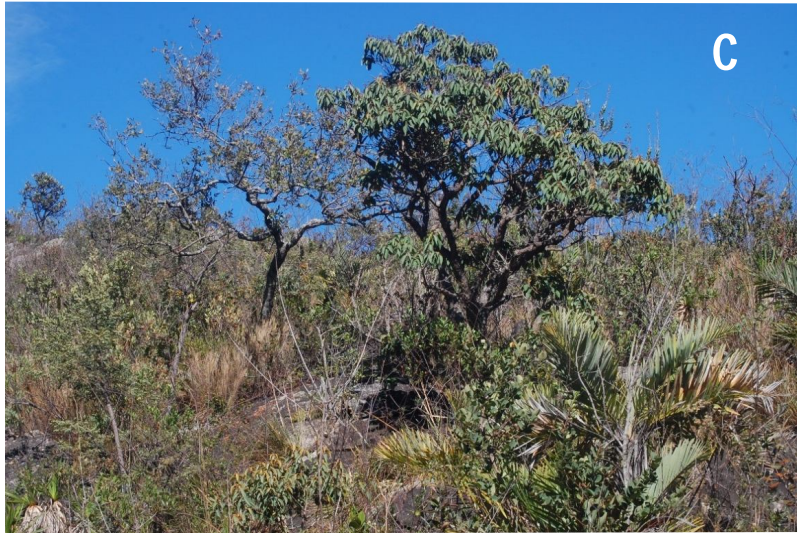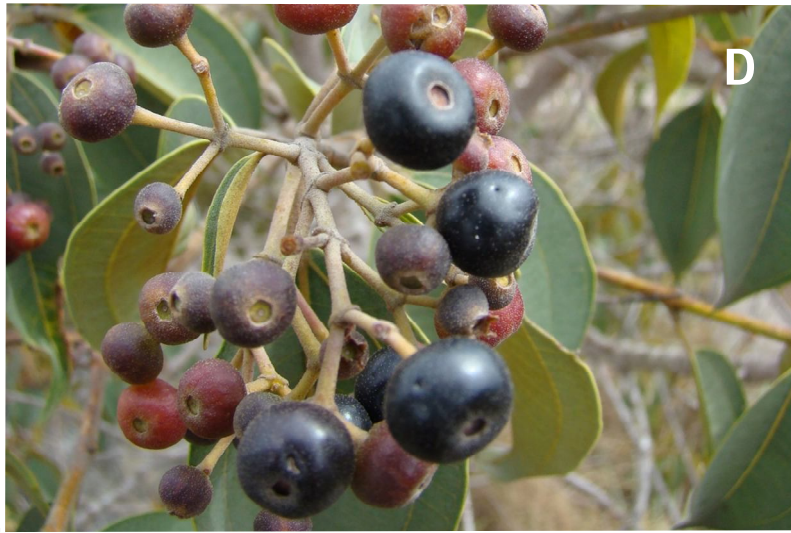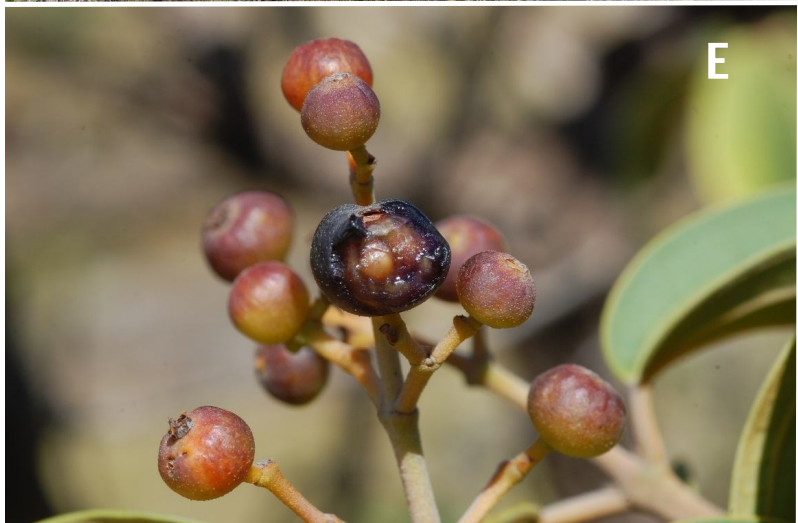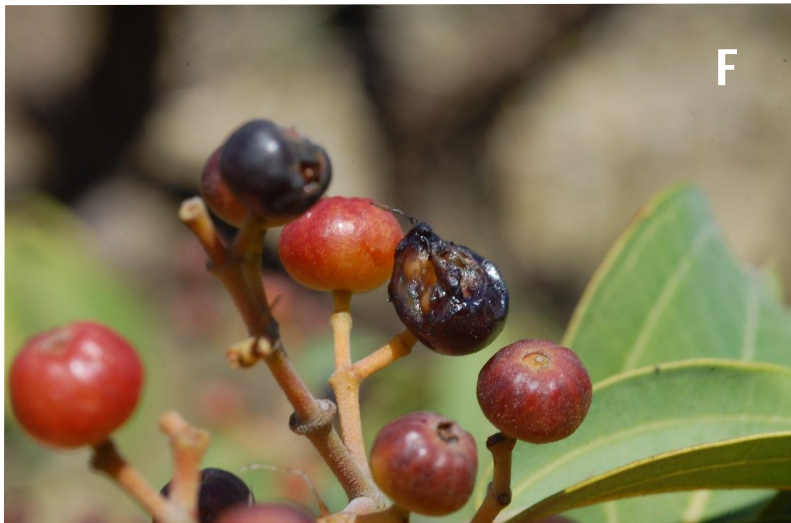

**S1 Figure. Overview of the study site and plant species.** A, B - Study site encompassing *campo rupestre* vegetation; C - *Miconia irwinii* treelet; D - Ripe fruits; E, F – Fruits with fleshy pulp partially eaten by birds.
