# Supplementary material for: Handling by avian frugivores affects diaspore secondary removal
Source: PubMed Central journal article supplement (PMC6114891; doi:10.1371/journal.pone.0202435), 2018-08-29
Supplement: pone.0202435.s002.pdf [file pone.0202435.s002.pdf]

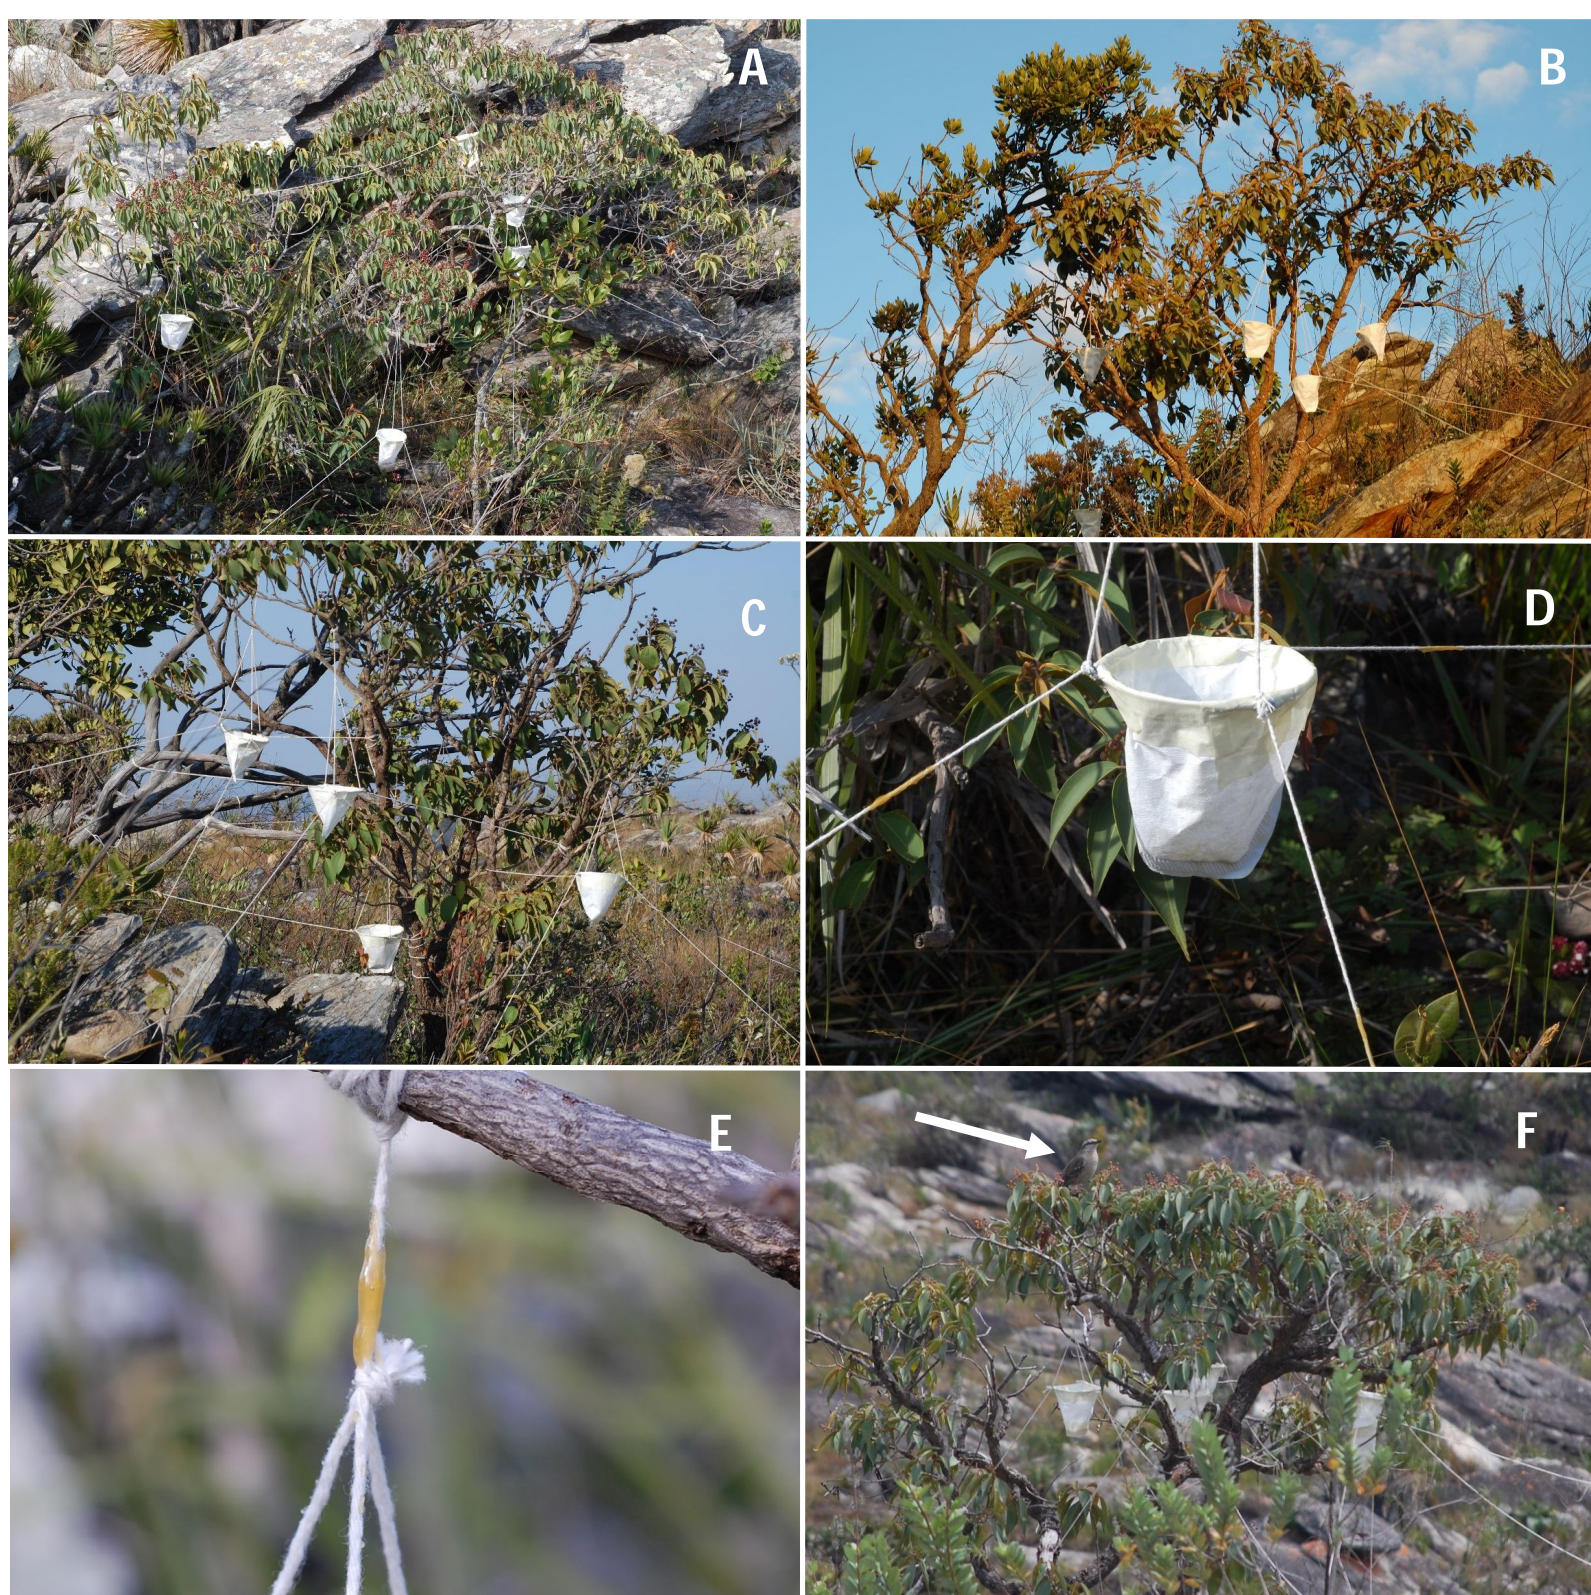

**S2 Figure.** Traps installed to intercept diaspores falling beneath the crown of *Miconia irwinii*. A, B, C - Fruiting individuals of *M. irwinii* with diaspore traps; D - Detail of a diaspore trap made with filter paper attached to wire circles; E - A twine coated with sticky barrier in detail; F - The Chalk-browed Mockingbird (*Mimus saturninus*) feeding on *M. irwinii* fruit above diaspore traps.
