# Supplementary material for: Handling by avian frugivores affects diaspore secondary removal
Source: PubMed Central journal article supplement (PMC6114891; doi:10.1371/journal.pone.0202435), 2018-08-29
Supplement: pone.0202435.s005.pdf [file pone.0202435.s005.pdf]

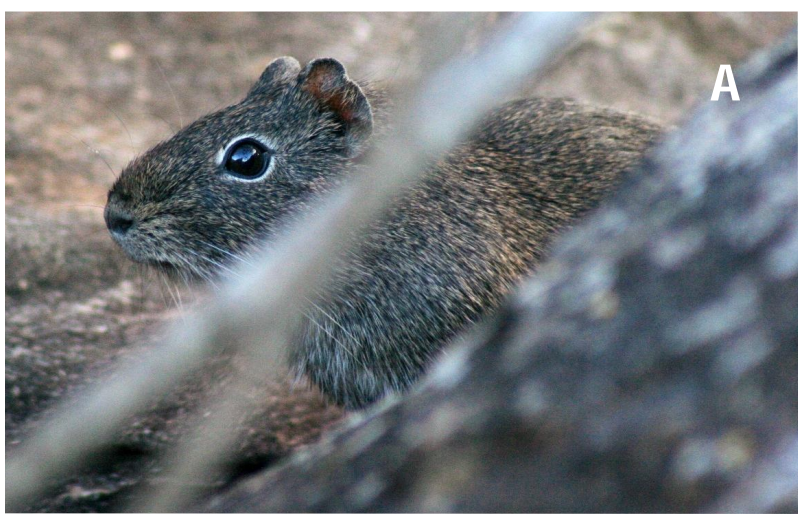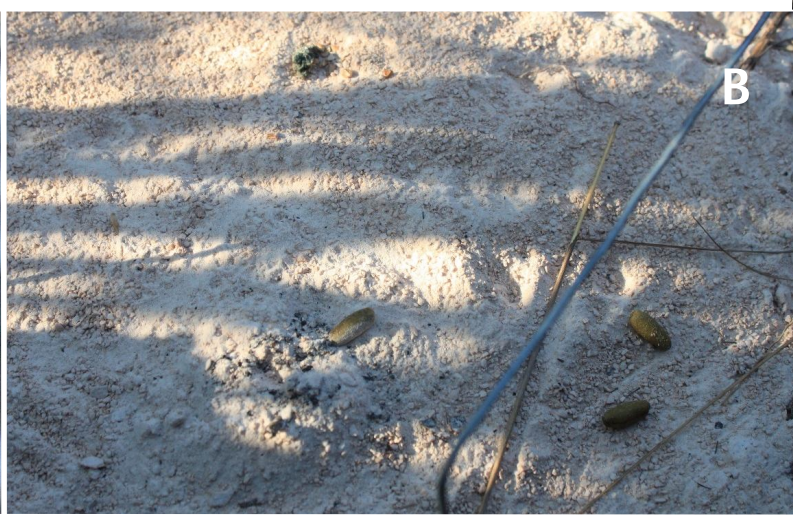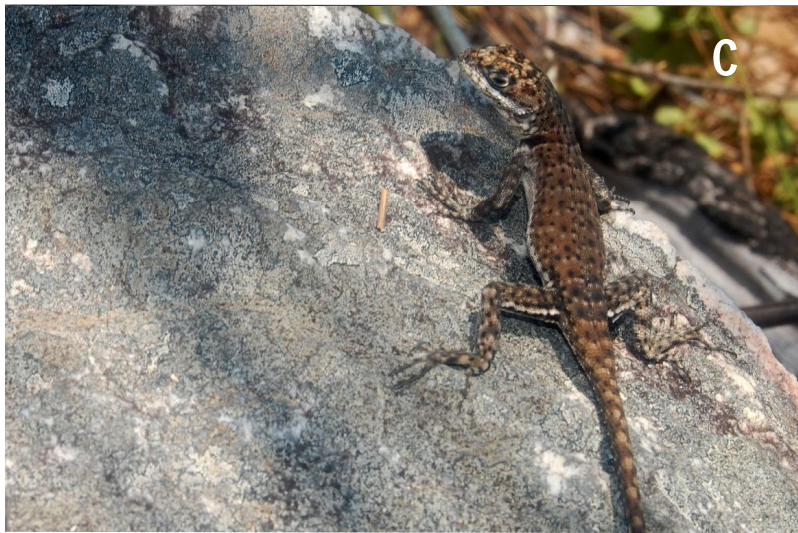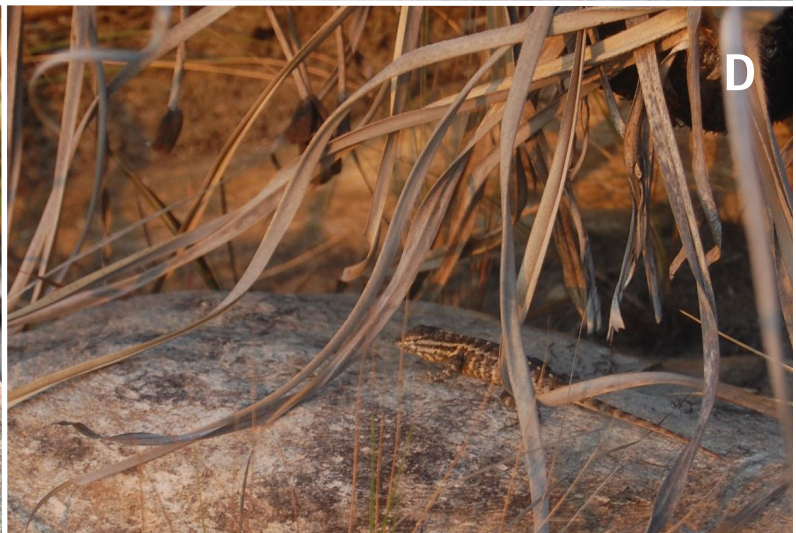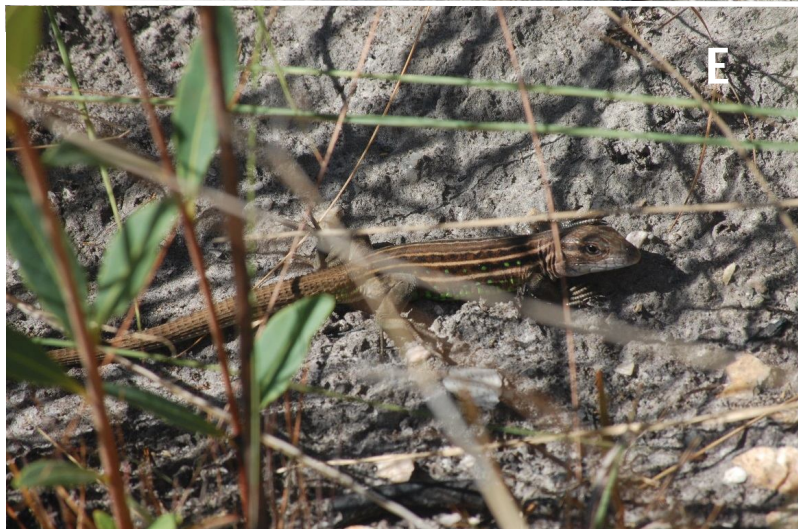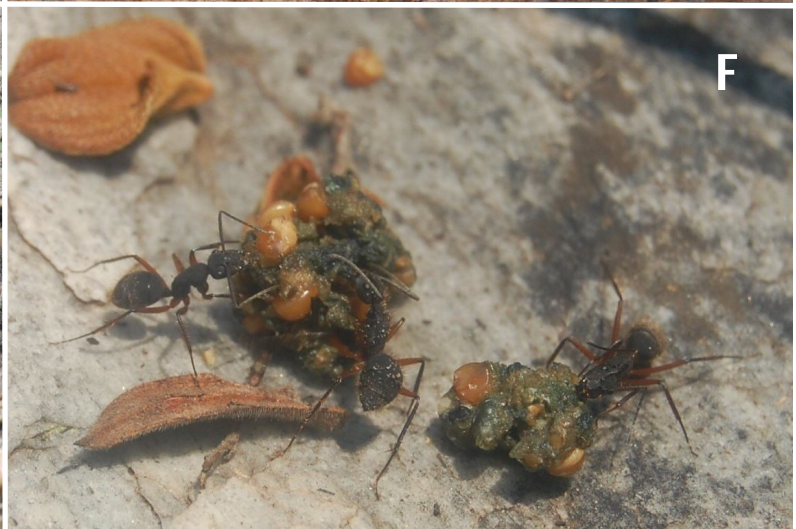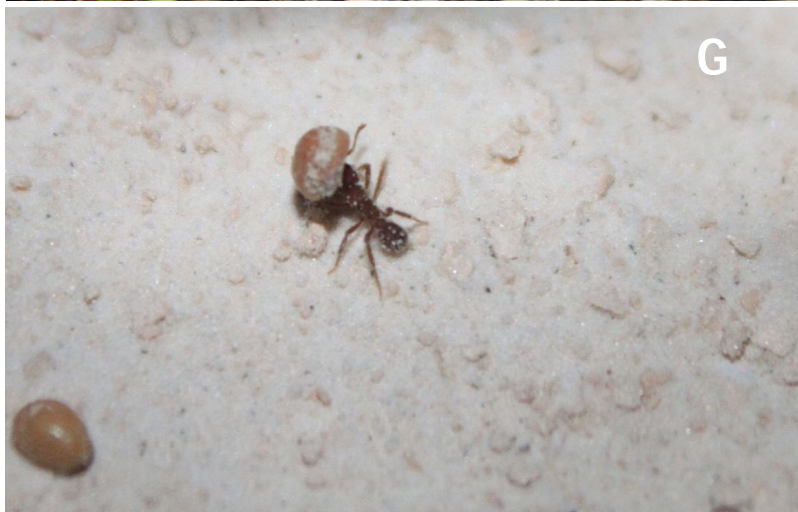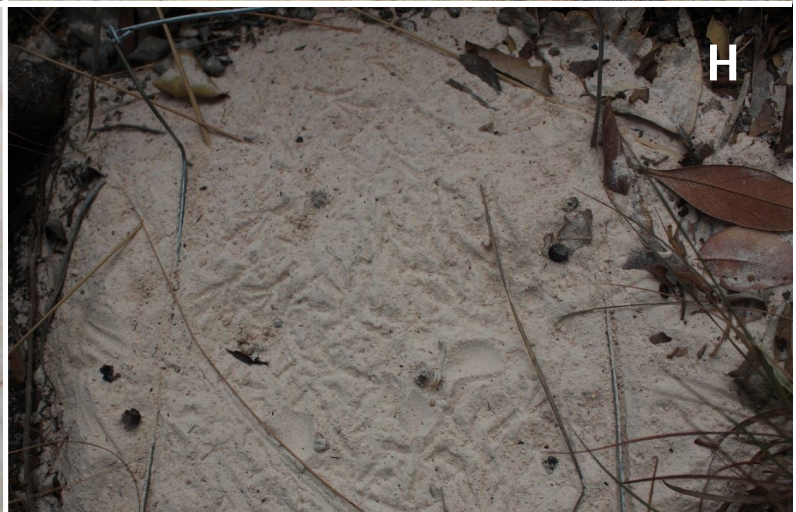

**S5 Figure Ground-dwelling fauna recorded during diaspore removal experiments.** A - The Brazilian Guinea Pig (*Cavia aperea*), its feces and footprints found on a tracking station with missing pulp-free seeds (B); The lizards *Tropidurus montanus* (C), *Eurolophosaurus nanuzae* (D) and *Ameivula cipoensis* (E) were frequently recorded near tracking stations; F - The ant *Camponotus rufipes* interacting with gut-passed seeds; G - Removal of pulp-free seed by the ant *Sericomyrmex* sp.; H - Bird footprints on tracking station with missing fruits.
